# Supplementary material
Source: PubMed Central journal article supplement (PMC4978041)
Supplement: ASN.2015050565_ASN2015050565SupplementaryData.pdf [file ASN.2015050565_ASN2015050565SupplementaryData.pdf]

## Supplementary Figure 1

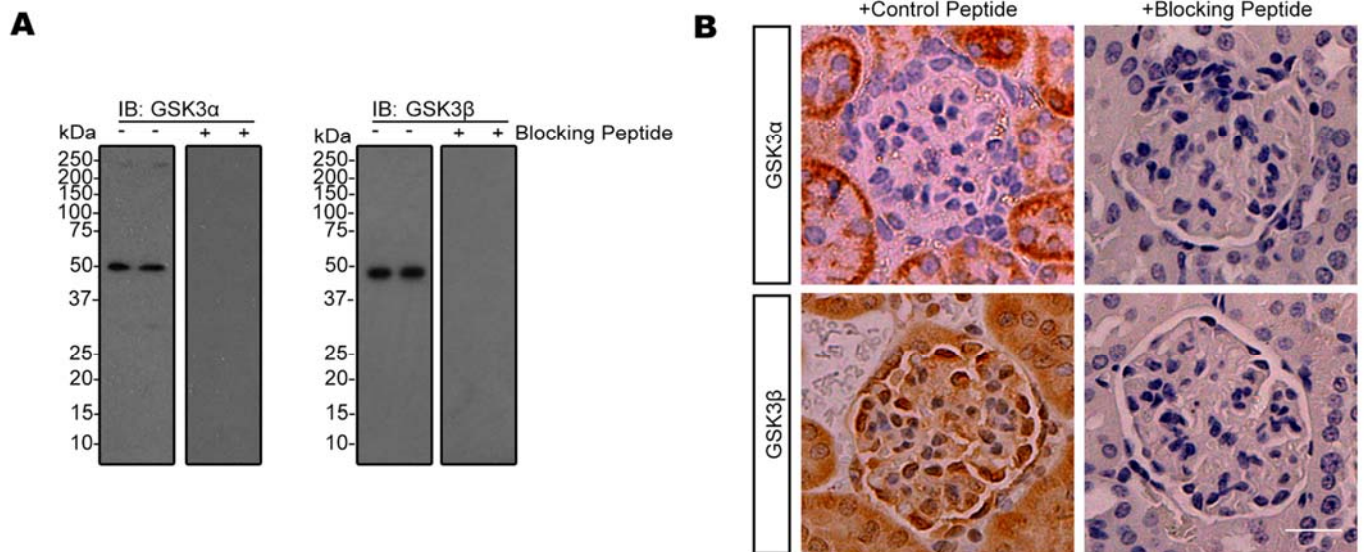

**Supplementary Figure 1. Validation of the specificity of the antibodies against GSK3 $\alpha$  and GSK3 $\beta$  for immunoblot analysis and immunohistochemistry staining.** (A) Total mouse kidney homogenates were prepared from wild-type FVB male mice and processed for immunoblot (IB) analysis by using antibodies specific for GSK3 $\alpha$  and GSK3 $\beta$  in the presence of control or specific blocking peptides. (B) Formalin-fixed paraffin-embedded kidney sections were subjected to peroxidase immunohistochemistry staining for GSK3 $\alpha$  and GSK3 $\beta$  in the presence of control or specific blocking peptides. Scale bar = 20 $\mu$ m

## Supplementary Figure 2

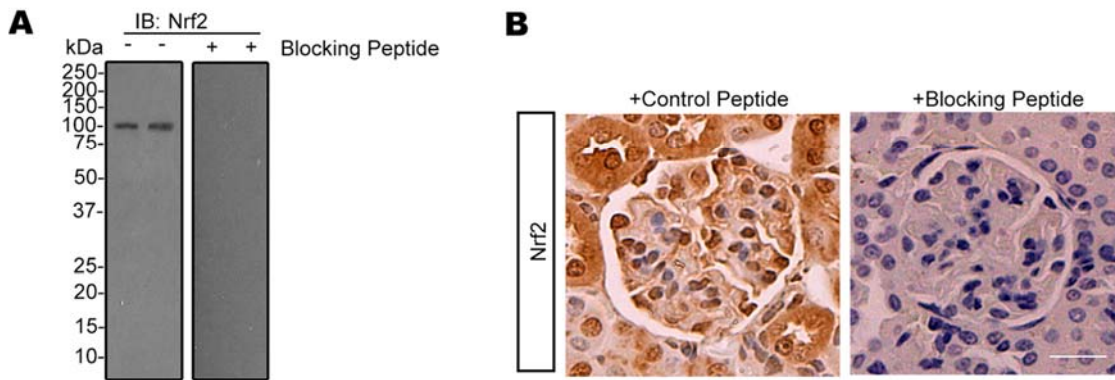

**Supplementary Figure 2. Validation of the specificity of the antibody against Nrf2 for immunoblot analysis and immunohistochemistry staining.** (A) Wild-type FVB/NJ male mice were injured with a single tail vein injection of adriamycin as described in Figure 7. Kidneys were excised from animals on day 7 and whole kidney homogenates were prepared and processed for immunoblot (IB) analysis for Nrf2 in the presence of a control peptide or specific blocking peptide. (B) Formalin-fixed paraffin-embedded ADR-injured kidney specimens were subjected to peroxidase immunohistochemistry staining for Nrf2 in the presence of a control peptide or specific blocking peptide. Scale bar = 20 $\mu$ m
